# Supplementary material for: Cyclic sulfamidates as lactam precursors. An efficient asymmetric synthesis of (-)-aphanorphine
Source: Royal Society of Chemistry journal article supplement (doi:10.1039/b510761j), 2005-01-01
Supplement: b510761j.pdf [file b510761j.pdf]

# Cyclic sulfamidates as lactam precursors. An efficient asymmetric synthesis of (-)-aphanorphine

John F. Bower,<sup>a</sup> Peter Szeto<sup>b</sup> and Timothy Gallagher<sup>a\*</sup>

<sup>a</sup> School of Chemistry, University of Bristol, Bristol, BS8 1TS, United Kingdom.

<sup>b</sup> Chemical Development, GlaxoSmithKline, Medicines Research Centre, Stevenage, SG1 2NY, United Kingdom.

## Supplementary Information

### (A) General experimental details

Starting materials sourced from commercial suppliers were used as received. Dry solvents, where necessary, were obtained by distillation using standard procedures or by passage through a column of anhydrous alumina using equipment from Anhydrous Engineering based on the Grubbs' design. Petrol refers to the fraction of petroleum ether boiling in the range of 40-60 °C. The removal of solvents *in vacuo* was achieved using both a Büchi rotary evaporator (bath temperatures up to 40 °C) at a pressure of either 15 mmHg (diaphragm pump) or 0.1 mmHg (oil pump), as appropriate, and a high vacuum line at room temperature. Reactions requiring anhydrous conditions were run under an atmosphere of dry nitrogen; glassware, syringes and needles were either flame dried immediately prior to use or placed in an oven (150 °C) for at least 2 hrs and allowed to cool either in a desiccator or under an atmosphere of dry nitrogen; liquid reagents, solutions or solvents were added *via* syringe through rubber septa; solid reagents were added *via* Schlenk type adapters. Commercially available Merck Kieselgel 60F<sub>254</sub> aluminium backed plates were used for TLC analysis. Visualisation was achieved by either UV fluorescence, acidic KMnO<sub>4</sub> solution and heat, ninhydrin stain and heat, ammonium molybdate solution and heat or iodine vapour. Flash column chromatography (FCC) was performed using Fluorochem 60 silica: 230-400 mesh (40-63 µm). The crude material was applied to the column as a solution in CH<sub>2</sub>Cl<sub>2</sub> or by pre-adsorption onto silica, as appropriate. Melting points were determined using a Reichert melting point table and temperature controller and are uncorrected. Optical rotations were measured using a Perkin-Elmer 241 polarimeter. Elemental analysis was performed by the University of Bristol microanalytical service. Infra-red spectra were recorded in the range 4000-600 cm<sup>-1</sup> on a Perkin Elmer

Spectrum either as neat films or solids compressed onto a diamond window. Abbreviations used are: w (weak), m (medium), s (strong) and br (broad). NMR spectra were recorded on a JEOL GX270, JEOL GX400, JEOL Lambda 300, JEOL Eclipse 400, JEOL Eclipse 300 or JEOL Alpha 500 spectrometer. Chemical shifts are quoted in parts per million (ppm);  $^1\text{H}$  NMR spectra are referenced to TMS or residual protium of the deuterated solvent;  $^{13}\text{C}$  NMR are referenced to TMS or the deuterated solvent. Coupling constants ( $J$ ) are quoted to the nearest 0.5 Hz. Other abbreviations used are: s (singlet), d (doublet), t (triplet), q (quartet), m (multiplet) and br (broad). Assignments of  $^1\text{H}$  NMR and  $^{13}\text{C}$  NMR signals were made where possible, using COSY, DEPT, HMQC and HMBC experiments. Where mixtures of isomers (*e.g.* diastereomers) have been characterised together, they are referred to as *A* and *B*. Mass spectra were determined by the University of Bristol mass spectrometry service by either electron impact (EI) or chemical ionisation (CI) using a Fisons VG Analytical Autospec spectrometer, or by electrospray ionisation (ESI) using a Brüker Daltonics Apex IV spectrometer. Chiral HPLC was performed using either the racemate or the antipode as a standard on an Agilent 1100 LC system equipped with a quaternary pump, diode array detector and column thermostat under the conditions specified in each case.

## (B) Experimental Procedures

### 2-Bromo-4-methoxybenzaldehyde (5)

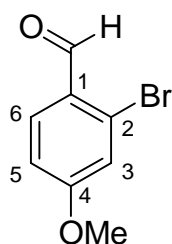

This compound was prepared by adaptation of the procedure of Durst.<sup>1</sup> To a solution of *N,N,N'*-trimethylethylenediamine (10.19 mL, 78.4 mmol, freshly distilled from  $\text{CaH}_2$ ) in anhydrous THF (180 mL) at  $-20\text{ }^\circ\text{C}$  was added, *via* syringe, *n*-BuLi (30.3 mL, 75.8 mmol, 2.5 M in hexanes) over two minutes and the resulting pale yellow mixture was stirred at  $-20\text{ }^\circ\text{C}$  for 15 minutes. *p*-Anisaldehyde (8.94 mL, 73.4 mmol)

was added *via* syringe in one portion and the resulting mixture was stirred at  $-20\text{ }^{\circ}\text{C}$  for 20 minutes. *n*-BuLi (88.1 mL, 220.2 mmol, 2.5 M in hexanes) was added *via* syringe and the mixture was stirred at  $-20\text{ }^{\circ}\text{C}$  for 30 minutes and then allowed to stand in the freezer (*ca.*  $-15\text{ }^{\circ}\text{C}$ ) for 24 hrs. The reaction mixture, now a deep orange solution, was cooled to  $-78\text{ }^{\circ}\text{C}$  and, with vigorous stirring, a solution of carbon tetrabromide (68.5 g, 207 mmol) in anhydrous THF (30 mL) was added dropwise, *via* syringe, over 15 minutes (**Caution:** slow addition of the quench is required to moderate the reaction exotherm). The resulting brown suspension was then poured into stirred, ice cold aq. 3 M HCl (500 mL) and extracted with Et<sub>2</sub>O ( $2 \times 500\text{ mL}$ ). The combined organic portions were concentrated to *ca.* 150 mL, washed with saturated aq. sodium thiosulfate solution ( $5 \times 100\text{ mL}$ ), water (100 mL) and then brine (100 mL), dried (Na<sub>2</sub>SO<sub>4</sub>) and then concentrated *in vacuo* to afford a brown oil (*ca.* 46 g). This was pre-adsorbed onto silica (*ca.* 120 g) and purified by FCC (hexanes-EtOAc 12:1) to yield a crude product which was then recrystallised from petrol (2 crops) to afford **5** (9.81 g, 62 %) as pale yellow needles; m.p.  $77.5 - 79\text{ }^{\circ}\text{C}$  (petrol) [Lit.<sup>1</sup>,  $70-71\text{ }^{\circ}\text{C}$  (EtOH)];  $\delta_{\text{H}}$  (400 MHz, CDCl<sub>3</sub>) 3.90 (3H, s, ArOCH<sub>3</sub>), 6.96 (1H, ddd,  $J = 8.5, 3.0$  and  $1.0$ , C5-H), 7.15 (1H, d,  $J = 3.0$ , C3-H), 7.91 (1H, d,  $J = 8.5$ , C6-H), 10.24 (1H, d,  $J = 1.0$ , Ar(CO)H). *The spectroscopic properties of this compound were consistent with the data available in the literature.*<sup>1</sup>

**(Z)-3-(2-Bromo-4-methoxyphenyl)-2-tert-butoxycarbonylaminoacrylic acid methyl ester (6)**

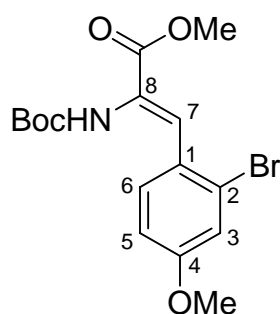

To solution of aldehyde **5** (512 mg, 2.38 mmol) and ( $\pm$ )-*N*-Boc- $\alpha$ -phosphonoglycine trimethyl ester (779 mg, 2.62 mmol) in anhydrous CH<sub>2</sub>Cl<sub>2</sub> (11 mL) was added tetramethylguanidine (448  $\mu\text{L}$ , 3.57 mmol) and the resulting solution was stirred at r.t. for 18 hrs. The reaction mixture was then diluted with CH<sub>2</sub>Cl<sub>2</sub> (10 mL), washed with 10 % aq. citric acid solution (20 mL) and then saturated aq. NaHCO<sub>3</sub> solution (20

mL), dried (Na<sub>2</sub>SO<sub>4</sub>) and concentrated *in vacuo* to afford a pale yellow oil. This was then purified by FCC (hexanes-EtOAc 7:2) to afford the dehydroamino ester **6** (909 mg, 99 %) as a viscous, colourless oil;  $\nu_{\max}$  / cm<sup>-1</sup> (film) 3336 (w), 1703 (s), 1231 (s), 1156 (s), 1026 (s);  $\delta_{\text{H}}$  (400 MHz, CDCl<sub>3</sub>) 1.36 (9H, s, NHCO<sub>2</sub>C(CH<sub>3</sub>)<sub>3</sub>), 3.83 (3H, s, ArOCH<sub>3</sub>), 3.88 (3H, s, CO<sub>2</sub>CH<sub>3</sub>), 6.25 (1H, br s, NHCO<sub>2</sub>C(CH<sub>3</sub>)<sub>3</sub>), 6.83 (1H, dd, *J* = 8.5 and 2.5, C5-H), 7.16 (1H, d, *J* = 2.5, C3-H), 7.38 (1H, s, C7-H), 7.60 (1H, d, *J* = 8.5, C6-H);  $\delta_{\text{C}}$  (100 MHz, CDCl<sub>3</sub>) 30.0 (NHCO<sub>2</sub>C(CH<sub>3</sub>)<sub>3</sub>), 52.6 (ArOCH<sub>3</sub>), 55.5 (CO<sub>2</sub>CH<sub>3</sub>), 80.7 (NHCO<sub>2</sub>C(CH<sub>3</sub>)<sub>3</sub>), 113.6 (C-5), 117.7 (C-3), 124.3, 125.7 and 126.8 (C-1, C-2 and C-8), 127.3 (C-7), 130.3 (C-6), 152.4 (C-4), 160.1 (NHCO<sub>2</sub>(CH<sub>3</sub>)<sub>3</sub>), 165.8 (CO<sub>2</sub>CH<sub>3</sub>); *m/z* (Cl<sup>+</sup>) 388 and 386 ([M+H]<sup>+</sup>, 84 and 82 %), 287 and 285 ([M+H-Boc]<sup>+</sup>, 100 and 98); HRMS: (ESI) Found: [M+Na]<sup>+</sup> 408.0414, C<sub>16</sub>H<sub>20</sub><sup>79</sup>BrNO<sub>5</sub> requires 408.0417. The stereochemistry of this compound was assigned as *Z* on the basis of related reactions described in the literature.<sup>2</sup>

**(R)-3-(2-Bromo-4-methoxyphenyl)-2-tert-butoxycarbonylamino propionic acid methyl ester (7)**

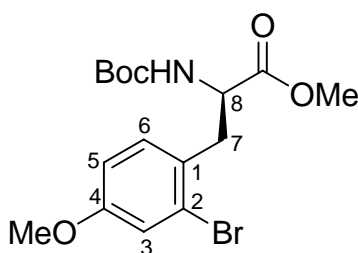

In an Aldrich Atmosbag ® (N<sub>2</sub> atmosphere), MeOH (13 mL, deoxygenated by passage of N<sub>2</sub> for 2 hrs) was added to a 25 mL r.b. flask containing dehydroamino ester **6** (436 mg, 1.13 mmol) and [(*R,R*)-Et-DuPHOS]Rh(COD)]BF<sub>4</sub> (11.1 mg, 1.5 mol %) and the reaction vessel was sealed inside a hydrogenation bomb. The system was then purged with H<sub>2</sub> (6 purge cycles at a pressure of 5 atm.) and stirred vigorously at r.t for 40 hrs. The mixture was then concentrated *in vacuo* and filtered through a pad of silica (60, 5 × 5 cm) eluting with EtOAc (*ca.* 30 mL). The eluent was concentrated *in vacuo* to afford the amino ester derivative **7** (440 mg, 100 %, 99 % e.e.) as a colourless, viscous oil;  $[\alpha]_{\text{D}}^{20}$  -5.1 (*c* = 0.8, CHCl<sub>3</sub>);  $\nu_{\max}$  / cm<sup>-1</sup> (film) 3374 (br), 2977 (br), 1715 (s), 1495 (s), 1243 (m), 1167 (s), 1029 (m);  $\delta_{\text{H}}$  (400 MHz, CDCl<sub>3</sub>) 1.39 (9H, s, NHCO<sub>2</sub>C(CH<sub>3</sub>)<sub>3</sub>), 3.05 (1H, dd, *J* = 14.0 and 7.5, C7-H), 3.25 (1H, dd, *J* = 14.0 and 6.5, C7-H), 3.73 (3H, s, CO<sub>2</sub>CH<sub>3</sub>), 3.79 (3H, s, ArOCH<sub>3</sub>), 4.60

(1H, ddd,  $J = 8.0, 7.5$  and  $6.5$ , C8-H), 5.08 (1H, d,  $J = 8.0$ ,  $\text{NHCO}_2\text{C}(\text{CH}_3)_3$ ), 6.81 (1H, dd,  $J = 8.5$  and  $3.0$ , C5-H), 7.10 (1H, d,  $J = 8.5$ , C6-H), 7.11 (1H, d,  $J = 3.0$ , C3-H);  $\delta_{\text{C}}$  (100 MHz,  $\text{CDCl}_3$ ) 28.2 ( $\text{NHCO}_2\text{C}(\text{CH}_3)_3$ ), 37.7 (C-7), 52.3 ( $\text{ArOCH}_3$ ), 53.7 (C-8), 55.5 ( $\text{CO}_2\text{CH}_3$ ), 80.0 ( $\text{NHCO}_2\text{C}(\text{CH}_3)_3$ ), 113.6 (C-5), 118.0 (C-3), 125.1 and 127.8 (C-1 and C-2), 131.6 (C-6), 155.0 (C-4), 158.1 ( $\text{NHCO}_2\text{C}(\text{CH}_3)_3$ ), 170.3 ( $\text{CO}_2\text{CH}_3$ ); HRMS: (ESI) Found:  $[\text{M}+\text{Na}]^+$  410.0570,  $\text{C}_{16}\text{H}_{22}^{79}\text{BrNO}_5$  requires 410.0574; Anal. Calcd for  $\text{C}_{16}\text{H}_{22}\text{NO}_5\text{Br}$ : C, 49.50; H, 5.71; N, 3.61. Found: C, 49.51; H, 5.41; N, 3.33.

The enantiomeric purity of this compound was determined by chiral HPLC (Chiralcel OJ-H, isocratic hexane - *i*-PrOH 95:5, 1.0 mL/min, 25 °C) against a racemic standard prepared under similar conditions using Wilkinson's catalyst ( $(\text{Ph}_3\text{P})_3\text{RhCl}$ , 5 mol %, 7 atm., 48 hrs);  $t_{\text{R}}$  (major) = 9.1 min and  $t_{\text{R}}$  (minor) = 12.6 min.

**[(R)-2-(2-Bromo-4-methoxyphenyl)-1-hydroxymethylethyl]-carbamic acid *tert*-butyl ester (8)**

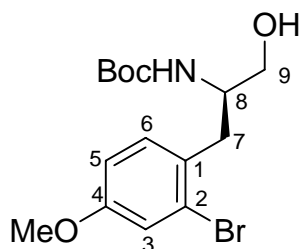

To a solution of ester **7** (569 mg, 0.72 mmol) in anhydrous THF (10 mL) at -78 °C was added, dropwise *via* syringe, a solution of  $\text{LiAlH}_4$  in THF (1 M, 2.16 mL, 2.16 mmol) over 2 minutes. The resulting solution was stirred at 0 °C for 30 minutes and then, sequentially, water (80  $\mu\text{L}$ ), aq. 4 M NaOH solution (80  $\mu\text{L}$ ) and water (240  $\mu\text{L}$ ) were added dropwise, *via* syringe (**Caution:** gas evolution), to form a colourless precipitate. The mixture was then filtered through Celite  $\text{\textcircled{R}}$ , rinsing copiously with  $\text{CH}_2\text{Cl}_2$  (*ca.* 50 mL), washed with water (20 mL) and then brine (20 mL), dried ( $\text{Na}_2\text{SO}_4$ ) and concentrated *in vacuo* to afford the alcohol **8** (498 mg, 96 %) as a colourless, crystalline solid; m.p. 87-90 °C ( $\text{Et}_2\text{O}$ -hexanes);  $[\alpha]_{\text{D}}^{20} +34.0$  ( $c = 1.5$ ,  $\text{CHCl}_3$ );  $\nu_{\text{max}} / \text{cm}^{-1}$  (film) 3394 (br m), 1689 (s), 1494 (s), 1243 (m), 1169 (m), 1028 (m);  $\delta_{\text{H}}$  (270 MHz,  $\text{CDCl}_3$ ) 1.39 (9H, s,  $\text{NHCO}_2\text{C}(\text{CH}_3)_3$ ), 2.50 (1H, br s, OH), 2.62-

3.01 (2H, m, C7-H), 3.54-3.95 (3H, m, C8-H and C9-H), 3.78 (3H, s, ArOCH<sub>3</sub>), 4.85 (1H, br d,  $J = 7.5$ , NHCO<sub>2</sub>C(CH<sub>3</sub>)<sub>3</sub>), 6.81 (1H, dd,  $J = 8.5$  and  $2.5$ , C5-H), 7.10 (1H, d,  $J = 2.5$ , C3-H), 7.18 (1H, d,  $J = 8.5$ , C6-H);  $\delta_C$  (100 MHz, CDCl<sub>3</sub>) 28.3 (NHCO<sub>2</sub>C(CH<sub>3</sub>)<sub>3</sub>), 36.5 (C-7), 53.3 and 55.5 (C-8 and ArOCH<sub>3</sub>), 64.4 (C-9), 79.8 (NHCO<sub>2</sub>C(CH<sub>3</sub>)<sub>3</sub>), 114.0 (C-5), 117.9 (C-3), 124.9 and 129.4 (C-1 and C-2), 131.9 (C-6), 156.3 (C-4), 158.8 (NHCO<sub>2</sub>(CH<sub>3</sub>)<sub>3</sub>); HRMS: (ESI) Found: [M+Na]<sup>+</sup> 382.0621, C<sub>15</sub>H<sub>22</sub><sup>79</sup>BrNO<sub>4</sub> requires 382.0624.

**(R)-3-(2-Bromo-4-methoxyphenyl)-2-methylaminopropan-1-ol (10)**

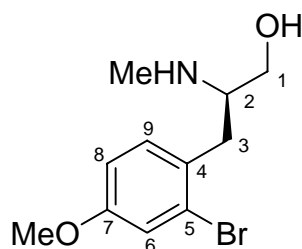

To a solution of *N*-Boc alcohol **8** (364 mg, 1.02 mmol) in anhydrous THF (12 mL) was added NaH (54.8 mg, 1.37 mmol, 60 % dispersion in mineral oil) causing immediate gas evolution. The resulting pale yellow slurry was then stirred at r.t. for 8 hrs prior to the addition of NaH (61.2 mg, 1.52 mmol, 60 % dispersion in mineral oil) and then MeI (254  $\mu$ L, 4.08 mmol). After stirring for a further 1 hr excess NaH was quenched by careful addition of water (**Caution:** vigorous gas evolution) and the mixture was concentrated *in vacuo*. The residue was dissolved in MeOH (6 mL) and 50 % aq. NaOH solution (3 mL) and then heated at reflux (oil bath *ca.* 90 °C) for 2 hrs. After cooling to r.t., the mixture was diluted with brine (20 mL) and extracted with CH<sub>2</sub>Cl<sub>2</sub> (3  $\times$  15 mL). The combined organic extracts were dried (Na<sub>2</sub>SO<sub>4</sub>) and concentrated *in vacuo* to afford a pale yellow solid. This was then dissolved in MeCN (20 mL), washed with hexane (2  $\times$  10 mL) and concentrated *in vacuo* to afford essentially pure amino alcohol **10** (129 mg, 92 %) as a pale yellow wax;  $[\alpha]_D^{20} +20.0$  ( $c = 0.6$ , CHCl<sub>3</sub>);  $\nu_{\max} / \text{cm}^{-1}$  (film) 3309 (br m), 1603 (m), 1491 (s), 1240 (s), 1026 (s);  $\delta_H$  (400 MHz, CDCl<sub>3</sub>) 2.12 (2H, br s, NHMe and CH<sub>2</sub>OH), 2.42 (3H, s, NHCH<sub>3</sub>), 2.71 (1H, dd,  $J = 13.0$  and  $7.0$ , C3-H), 2.83-2.89 (1H, m, C2-H), 2.91 (1H, dd,  $J = 13.0$  and  $6.5$ , C3-H), 3.31 (1H, dd,  $J = 11.0$  and  $5.0$ , C1-H), 3.61 (1H, dd,  $J = 11.0$  and  $4.0$ , C1-

H), 3.77 (3H, s, ArOCH<sub>3</sub>), 6.80 (1H, dd, *J* = 8.5 and 2.5, C8-H), 7.09 (1H, d, *J* = 2.5, C6-H), 7.11 (1H, d, *J* = 8.5, C9-H); δ<sub>C</sub> (100 MHz, CDCl<sub>3</sub>) 33.7 (NCH<sub>3</sub>), 36.9 (C-3), 55.5 (ArOCH<sub>3</sub>), 60.4 (C-2), 61.8 (C-1), 113.6 (C-8), 118.1 (C-6), 124.8 and 130.0 (C-4 and C-5), 131.7 (C-9), 158.7 (C-7); HRMS: (ESI) Found: [M+H]<sup>+</sup> 274.0437, C<sub>11</sub>H<sub>17</sub><sup>79</sup>BrNO<sub>2</sub> requires 274.0437.

**(R)-4-(2-Bromo-4-methoxybenzyl)-3-methyl-1,2,3-oxathiazolidine 2,2-dioxide (4)**

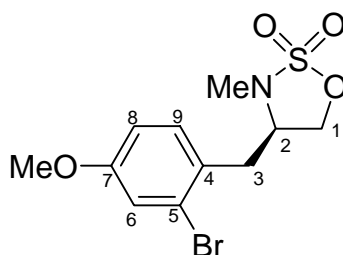

To an ice cold solution of amino alcohol **10** (468 mg, 1.7 mmol), imidazole (465 mg, 6.84 mmol) and Et<sub>3</sub>N (501 μL, 3.66 mmol) in anhydrous CH<sub>2</sub>Cl<sub>2</sub> (15 mL) was added, dropwise, *via* syringe, over 5 minutes, a solution of SOCl<sub>2</sub> (150 μL, 2.04 mmol) in anhydrous CH<sub>2</sub>Cl<sub>2</sub> (3 mL). The resulting colourless solution was stirred at 0 °C for 2.5 hrs and then poured into aq. 1 M HCl (15 mL). The organic portion was isolated and the aqueous portion was extracted with CH<sub>2</sub>Cl<sub>2</sub> (2 × 15 mL). The combined organic extracts were washed with water (15 mL) and then brine (15 mL), dried (Na<sub>2</sub>SO<sub>4</sub>) and concentrated *in vacuo* to afford intermediate cyclic sulfamidite (533 mg, 98 %) as a pale yellow oil. *This material was used immediately in the next stage without further purification.* To a vigorously stirred, ice cold solution of NaIO<sub>4</sub> (69 mg, 0.32 mmol) and RuCl<sub>3</sub> (0.1 mg, 0.15 mol %) in water (2 mL) was added, in one portion, a solution of sulfamidite (100 mg, 0.32 mmol) in EtOAc (3 mL). The resulting pale brown suspension was stirred at 0 °C until careful TLC analysis showed complete consumption of starting material (*ca.* 0.25 hrs; TLC conditions: 1:1 Et<sub>2</sub>O-Petrol; intermediate sulfamidite co-elutes with sulfamidate **4** but can be stained using KMnO<sub>4</sub> dip without the need for heat). The mixture was then diluted with EtOAc (10 mL) and aq. 1 M HCl (10 mL) and the organic portion was isolated, washed with brine (10 mL), dried (Na<sub>2</sub>SO<sub>4</sub>) and concentrated *in vacuo* to afford a brown residue which was immediately purified by FCC (Et<sub>2</sub>O-petrol 1:1, CH<sub>2</sub>Cl<sub>2</sub> loading) to afford the sulfamidate **4** (88 mg, 82 %, 99 % e.e.) as a colourless crystalline solid; m.p. 82-83 °C

(Et<sub>2</sub>O);  $[\alpha]_D^{20} +8.9$  (c = 0.9, CHCl<sub>3</sub>);  $\nu_{\max}$  / cm<sup>-1</sup> (film) 1605 (m), 1494 (m), 1345 (s), 1179 (s), 1028 (m), 972 (m);  $\delta_H$  (400 MHz, CDCl<sub>3</sub>) 2.79 (3H, s, NHCH<sub>3</sub>), 2.88 (1H, dd,  $J$  = 14.0 and 9.0, C3-H), 3.26 (1H, dd,  $J$  = 14.0 and 5.5, C3-H), 3.75-3.85 (1H, m, C2-H), 3.80 (3H, s, Ar-OCH<sub>3</sub>), 4.26 (1H, dd,  $J$  = 8.5 and 7.0, C1-H), 4.40 (1H, dd,  $J$  = 8.5 and 6.5, C1-H), 6.84 (1H, dd,  $J$  = 8.5 and 2.5, C6-H), 7.13 (1H, d,  $J$  = 2.5, C8-H), 7.14 (1H, d,  $J$  = 8.5, C5-H);  $\delta_C$  (100 MHz, CDCl<sub>3</sub>) 34.0 (NCH<sub>3</sub>), 37.4 (C-3), 55.7 and 60.5 (ArOCH<sub>3</sub> and C-2), 70.5 (C-1), 114.1 (C-6), 118.7 (C-8), 124.7 and 126.2 (C-4 and C-9), 132.0 (C-5), 159.7 (C-7);  $m/z$  (CI<sup>+</sup>) 336 and 338 ([M+H]<sup>+</sup>, 100 and 95 %); HRMS: (CI<sup>+</sup>) Found: [M+H]<sup>+</sup> 335.9891, C<sub>11</sub>H<sub>14</sub><sup>79</sup>BrNO<sub>4</sub>S requires 335.9905. *The oxidation step could conveniently be carried out on a larger scale (up to 10 mmol) but resulted in diminished and variable yields of the product 4 (58 - 77 %).*

The enantiomeric purity of this compound was determined by chiral HPLC (Chiralcel OJ-H, isocratic hexane - *i*-PrOH 70:30, 1.0 mL/min, 25 °C);  $t_R$  (major) = 28.3 min and  $t_R$  (minor) = 31.7 min.

**[(R)-5-(2-Bromo-4-methoxybenzyl)-1-methyl-2-oxopyrrolidin-3-yl]-phosphonic acid diethyl ester (11)**

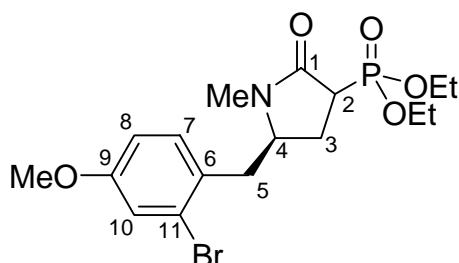

To a solution of triethyl phosphonoacetate (355  $\mu$ L, 1.79 mmol) in anhydrous THF (8 mL) was added *t*-BuOK (200 mg, 1.79 mmol) and the mixture was heated at 40 °C to form a clear solution. After 25 minutes, sulfamidate **4** (300 mg, 0.89 mmol) was added and the reaction was stirred at 40 °C for a further 15 hrs. The mixture was then cooled to r.t. and treated with aq. 5 M HCl (0.89 mmol) and stirred at r.t. for 3 hrs. The mixture was neutralised by addition of saturated aq. NaHCO<sub>3</sub> solution, stirred for 12 hrs, diluted with brine (10 mL) and extracted with CH<sub>2</sub>Cl<sub>2</sub> (2  $\times$  20 mL). The organic portion was dried (Na<sub>2</sub>SO<sub>4</sub>) and concentrated *in vacuo*. The residue was purified by FCC (EtOAc-MeOH 19:1) to yield the  $\alpha$ -phosphono lactam **11** (311 mg,



84 %, 4:3 d.r. A:B) as a colourless oil;  $\nu_{\max}$  /  $\text{cm}^{-1}$  (film) 2981 (br w), 1687 (s), 1492 (m), 1240 (s), 1021 (s), 963 (m);  $\delta_{\text{H}}$  (400 MHz,  $\text{CDCl}_3$ ) 1.24-1.40 (12H, m,  $\text{OCH}_2\text{CH}_3$  of A and B), 1.99-2.38 (4H, m, C3-H of A and B), 2.54 (1H, dd,  $J = 13.0$  and  $9.0$ , C5-H of A), 2.79 (1H, dd,  $J = 13.0$  and  $10.5$ , C5-H of B), 2.56-3.01 (8H, m,  $\text{NCH}_3$  and C2-H of A and B), 3.27 (1H, dd,  $J = 13.0$  and  $4.0$ , C5-H of A), 3.37 (1H, dd,  $J = 13.0$  and  $4.0$ , C5-H of B), 3.78-3.85 (1H, m, C4-H of B), 3.79 (3H, s,  $\text{ArOCH}_3$  of B), 3.80 (3H, s,  $\text{ArOCH}_3$  of A), 3.85-3.94 (1H, m, C4-H of A), 4.09-4.33 (8H, m,  $\text{OCH}_2$  of A and B), 6.80-6.85 (2H, m, C8-H of A and B), 7.08 (1H, d,  $J = 8.5$ , C7-H of A), 7.11-7.15 (2H, m, C10-H of A and B), 7.25 (1H, d,  $J = 8.5$ , C7-H of B);  $\delta_{\text{C}}$  (100 MHz,  $\text{CDCl}_3$ ) 16.3-16.7 (4C, m,  $\text{OCH}_2\text{CH}_3 \times 4$ ), 25.1 (d,  $^2J_{\text{PC}} = 4.0$ , C-3 of B), 26.1 (d,  $^2J_{\text{PC}} = 3.5$ , C-3 of A), 28.7 (2 signals) ( $\text{NCH}_3$  of A and B), 38.6 (C-5 of A), 39.2 (C-5 of B), 40.0 (d,  $^1J_{\text{PC}} = 144.5$ , C-2 of A), 40.4 (d,  $^1J_{\text{PC}} = 146.0$ , C-2 of B), 55.6 and 55.7 ( $\text{ArOCH}_3$  of A and B), 58.2 (d,  $^3J_{\text{PC}} = 5.0$ , C-4 of B), 58.5 (d,  $^3J_{\text{PC}} = 6.0$ , C-4 of A), 62.1-63.5 (4C, m,  $\text{OCH}_2\text{CH}_3 \times 4$ ), 113.8 (C-8 of A), 114.0 (C-8 of B), 118.4 (C-10 of A), 118.5 (C-10 of B), 124.7, 125.0, 128.0 and 128.5 (C-6 and C-11 of A and B), 131.7 (C-7 of B), 132.5 (C-7 of A), 159.3 (2 signals) (C-9 of A and B), 169.3 (d,  $^2J_{\text{PC}} = 3.5$ , C-1 of B), 169.4 (d,  $^2J_{\text{PC}} = 3.5$ , C-1 of A);  $\delta_{\text{P}}$  (121 MHz,  $\text{CDCl}_3$ ) 25.0 (B) and 25.1 (A); HRMS: (ESI) Found:  $[\text{M}+\text{Na}]^+$  456.0545,  $\text{C}_{22}\text{H}_{25}^{79}\text{BrNO}_5\text{P}$  requires 456.0546.

**(S)-5-(2-Bromo-4-methoxybenzyl)-1-methyl-3-methylenepyrrolidin-2-one (3)**

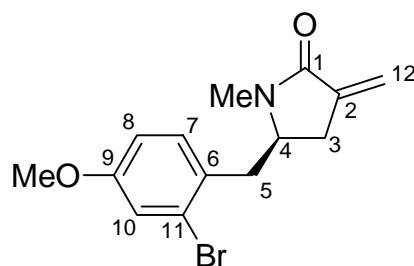

$\text{NaH}$  (21.4 mg, 0.54 mmol, 60 % dispersion in mineral oil) was washed, *via* syringe, with anhydrous hexane ( $2 \times 0.5$  mL) and then suspended in anhydrous THF (1 mL). To this suspension was added, *via* syringe, a solution of  $\alpha$ -phosphono lactam **11** (217 mg, 0.51 mmol) in anhydrous THF (1 mL and 0.5 mL line wash) resulting in immediate gas evolution and the formation of a brown solution. Paraformaldehyde (30.6 mg, 1.02 mmol) was added and the mixture was stirred at r.t. for 3 hrs. The

reaction was quenched by addition of aq. 1 M HCl (2 mL), then diluted with brine (10 mL) and extracted with EtOAc (2 × 20 mL). The combined organic extracts were washed with aq. 1 M NaOH solution (20 mL) and then brine (20 mL), dried (Na<sub>2</sub>SO<sub>4</sub>) and concentrated *in vacuo*. The residue was dissolved in EtOAc and rapidly filtered through a short plug of silica (60, 2 × 2 cm) eluting with EtOAc (30 mL). Concentration of the eluent *in vacuo* afford the exocyclic alkene **3** (116 mg, 74 %) as a pale yellow oil. *This material was unstable to chromatography (60 silica or neutral alumina) and so was used in the next stage without further purification*;  $\delta_{\text{H}}$  (400 MHz, CDCl<sub>3</sub>) 2.46-2.55 (2H, m, C3-H and C5-H), 2.68 (1H, dddd,  $J = 17.0, 8.0, 3.0$  and  $3.0$ , C3-H), 3.00 (3H, s, NCH<sub>3</sub>), 3.29 (1H, dd,  $J = 13.5$  and  $4.5$ , C5-H), 3.80 (3H, s, ArOCH<sub>3</sub>), 3.80-3.88 (1H, m, C4-H), 5.28 (1H, ddd,  $J = 3.0, 3.0$  and  $1.0$ , C12-H), 5.97 (1H, ddd,  $J = 3.0, 3.0$  and  $1.0$ , C12-H), 6.82 (1H, dd,  $J = 8.5$  and  $3.0$ , C8-H), 7.09 (1H, d,  $J = 8.5$ , C7-H), 7.13 (1H, d,  $J = 3.0$ , C10-H);  $\delta_{\text{C}}$  (100 MHz, CDCl<sub>3</sub>) 28.8 (NCH<sub>3</sub>), 30.4 (C-3), 39.3 (C-5), 55.6 and 56.0 (ArOCH<sub>3</sub> and C-4), 113.8 (C-8), 115.5 (C-12), 118.5 (C-10), 125.0 and 128.3 (C-6 and C-11), 131.8 (C-7), 138.9 (C-2), 159.2 (C-9), 168.2 (C-1).

**(1R,9R)-4-Methoxy-1,10-dimethyl-10-azatricyclo[7.2.1.0<sup>2,7</sup>]dodeca-2,4,6-trien-11-one (12) and (R)-5-(4-methoxybenzyl)-1,3-dimethyl-1,5-dihydropyrrol-2-one (16)**

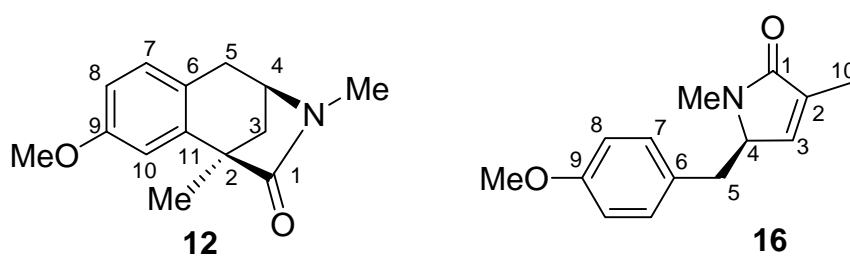

A stock solution was prepared by dissolving AIBN (42 mg, 0.26 mmol, freshly recrystallised from Et<sub>2</sub>O and dried under high vacuum (r.t., 0.01 mmHg) for 4 hrs) and freshly prepared Bu<sub>3</sub>SnH (200 mg, 0.57 mmol) in anhydrous benzene (32 mL, freshly distilled from sodium benzophenone ketyl and further deoxygenated by passage of N<sub>2</sub> for 2 hrs). To a flask containing a solution of alkene **3** (28 mg, 0.09 mmol) in refluxing benzene (8 mL, prepared as above) was added a portion of the stock solution (8 mL) over 1.5 hrs *via* syringe pump. After stirring for a further 1 hr the mixture was cooled to r.t. and concentrated *in vacuo*. The residue was dissolved in MeCN (10 mL) and washed with hexane (2 × 5 mL). The MeCN portion was then

concentrated *in vacuo* to afford a colourless oil which was purified by FCC (EtOAc-hexanes 4:1) to yield the tricycle **12** (13.0 mg, 62 %) as a colourless crystalline solid and subsequently the endocyclic alkene **16** (3.7 mg, 18 %) as a colourless oil.

**12:** m.p. 147-148 °C (EtOAc-hexanes) [Lit.<sup>3</sup>, 142-143 °C (racemate, no recrystallisation solvent quoted)];  $[\alpha]_D^{20}$  -20.0 (c = 1.2, CHCl<sub>3</sub>);  $\nu_{\max}$  / cm<sup>-1</sup> (film) 2934 (m), 1695 (s), 1289 (m), 1244 (m), 1040 (m);  $\delta_H$  (400 MHz, CDCl<sub>3</sub>) 1.55 (3H, s, C2-CH<sub>3</sub>), 2.03 (1H, d, *J* = 10.5, C3-H), 2.18 (1H, dd, *J* = 10.5 and 5.5, C3-H), 2.83 (3H, s, NCH<sub>3</sub>), 2.87-3.00 (2H, m, C5-H), 3.78 (3H, s, ArOCH<sub>3</sub>), 3.84 (1H, dt, *J* = 5.5 and 2.5, C4-H), 6.74 (1H, dd, *J* = 8.5 and 3.0, C8-H), 6.84 (1H, d, *J* = 3.0, C10-H), 6.99 (1H, d, *J* = 8.5, C7-H);  $\delta_C$  (100 MHz, CDCl<sub>3</sub>) 17.5 (C2-CH<sub>3</sub>), 27.6 (NCH<sub>3</sub>), 30.0 (C-5), 40.7 (C-3), 45.2 (C-2), 54.9 and 55.3 (ArOCH<sub>3</sub> and C-4), 110.1 (C-10), 112.8 (C-8), 124.4 (C-6), 130.7 (C-7), 141.5 (C-11), 158.1 (C-9), 177.1 (C-1); *m/z* (CI<sup>+</sup>) 232 ([M+H]<sup>+</sup>, 100 %); HRMS: (CI<sup>+</sup>) Found: [M+H]<sup>+</sup> 232.1331, C<sub>14</sub>H<sub>18</sub>NO<sub>2</sub> requires 232.1338. *The spectroscopic properties of this compound were consistent with the data available in the literature.*<sup>3</sup>

**16:** *This material was contaminated with ca. 5 % of 16 as judged by <sup>1</sup>H NMR;*  $\nu_{\max}$  / cm<sup>-1</sup> (film) 2924 (br), 1685 (s), 1513 (m), 1248 (m), 1035 (w);  $\delta_H$  (400 MHz, CDCl<sub>3</sub>) 1.84 (3H, t, *J* = 1.5, C10-H), 2.51 (1H, dd, *J* = 13.5 and 9.0, C5-H), 3.01 (3H, s, NCH<sub>3</sub>), 3.11 (2H, dd, *J* = 13.5 and 5.0, C5-H), 3.80 (3H, s, ArOCH<sub>3</sub>), 3.94-4.01 (1H, m C4-H), 6.50 (1H, t, *J* = 1.5, C3-H), 6.84 (2H, d, *J* = 9.0, C8-H), 7.07 (2H, d, *J* = 9.0 C7-H);  $\delta_C$  (100 MHz, CDCl<sub>3</sub>) 11.2 (C-10), 27.7 (NCH<sub>3</sub>), 37.0 (C-5), 55.3 (ArOCH<sub>3</sub>), 63.4 (C-4), 114.0 (C-8), 128.4 and 135.3 (C-2 and C-6), 130.1 (C-9), 139.5 (C-3), 158.5 (C-9), 172.0 (C-1); *m/z* (CI<sup>+</sup>) 232 ([M+H]<sup>+</sup>, 100 %); HRMS: (CI<sup>+</sup>) Found: [M+H]<sup>+</sup> 232.1335, C<sub>14</sub>H<sub>18</sub>NO<sub>2</sub> requires 232.1338.

### Preparation of Bu<sub>3</sub>SnH

This was prepared according to the procedure of Hayashi *et al.*<sup>4</sup> Thus, (Bu<sub>3</sub>Sn)<sub>2</sub>O (1.7 mL, 3.36 mmol) was added *via* syringe to a N<sub>2</sub> purged flask containing poly(methylhydrosiloxane) (401  $\mu$ L, 6.72 mmol) causing a mild exotherm. The mixture was stirred at r.t. for 1 hr (until no further exotherm was observed) and then distilled (*ca.* 85 °C, 0.1 mmHg) to afford Bu<sub>3</sub>SnH as a colourless oil (*N.B.* An initial

minor fraction (b.p. *ca.* 65 °C, 0.1 mmHg) was discarded). *This material was generally prepared immediately prior to use but, if desired, could be stored under N<sub>2</sub> at 5 °C for up to 48 hrs without any evidence (cloudiness) of decomposition.*

**(+)-*O*-Methyl aphanorphine (13)**

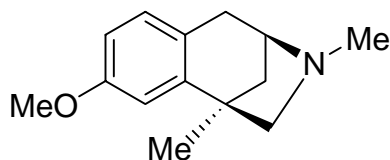

Lactam **12** was converted to (+)-*O*-methyl aphanorphine **13** using the procedure described by Funk;<sup>3</sup>  $[\alpha]_D^{20} +8.3$  (*c* = 0.5, CHCl<sub>3</sub>); lit.  $[\alpha]_D^{28} +8.1$  (*c* 1.2, CHCl<sub>3</sub>),<sup>5</sup>  $[\alpha]_D^{20} +9.4$  (*c* 0.3, CHCl<sub>3</sub>),<sup>6</sup>  $[\alpha]_D^{20} +8.7$  (*c* 1.06, CHCl<sub>3</sub>);<sup>7</sup>  $\delta_H$  (400 MHz, CDCl<sub>3</sub>) 1.48 (3H, s), 1.84 (1H, d, *J* = 11.0), 2.01 (1H, ddd, *J* = 11.0, 5.5 and 1.0), 2.47 (3H, s), 2.73 (1H, d, *J* = 9.0), 2.80-2.87 (2H, m), 3.01 (1H, d, *J* = 17.0), 3.39 (1H, ddd, *J* = 5.5, 3.0 and 3.0), 3.78 (3H, s), 6.68 (1H, dd, *J* = 8.5 and 2.5), 6.78 (1H, d, *J* = 2.5), 7.02 (1H, d, *J* = 8.5);  $\delta_C$  (125 MHz, CDCl<sub>3</sub>) 21.5, 35.7, 41.6, 41.7, 43.2, 55.3, 61.3, 71.3, 109.4, 110.9, 126.1, 130.2, 148.1, 157.7 . *The spectroscopic properties of this compound were consistent with the data available in the literature.*<sup>8</sup>

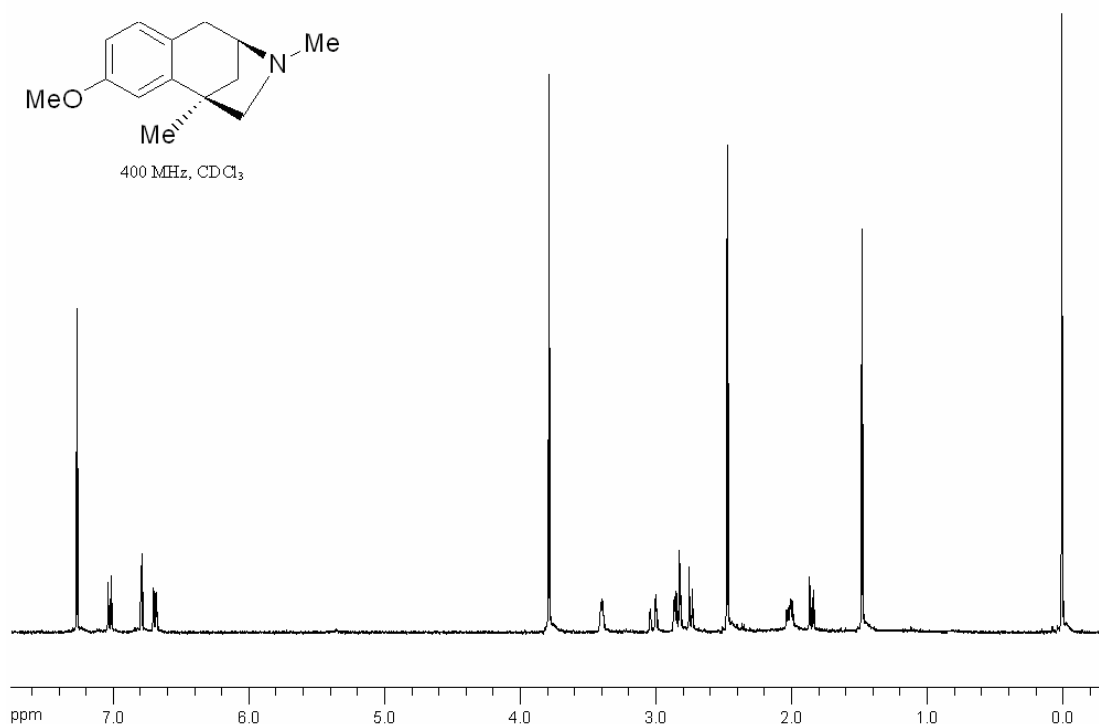

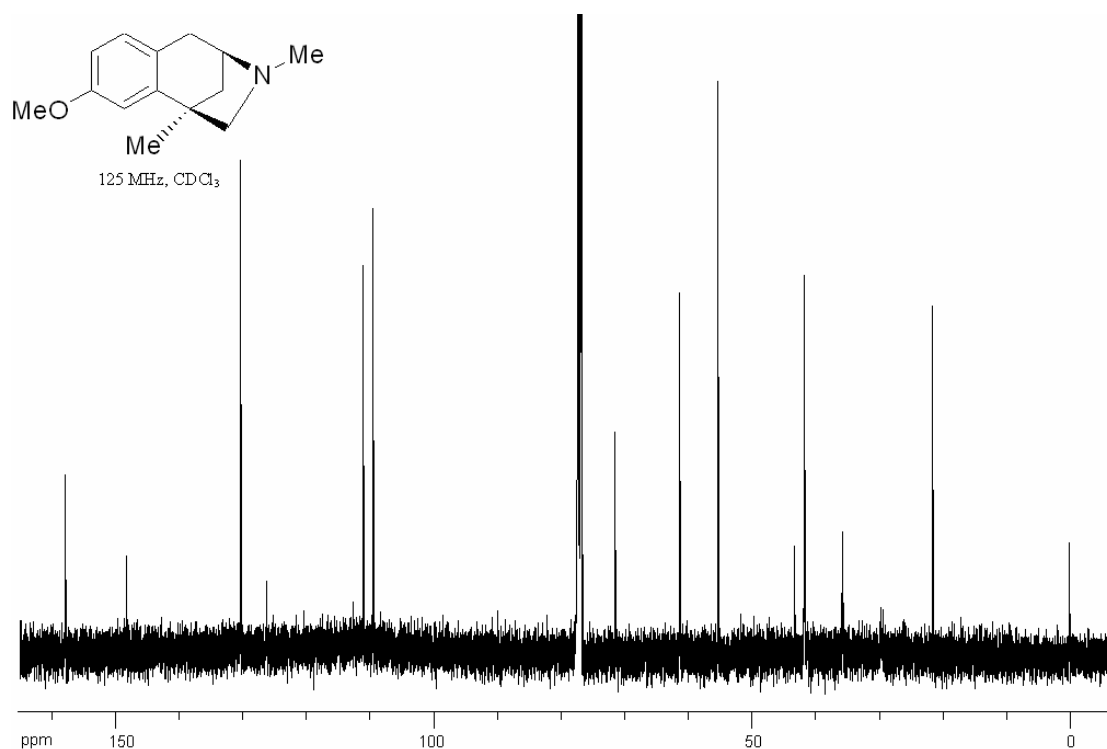

### (C) References

1. Y. Lear and T. Durst, *Can. J. Chem.*, 1997, **75**, 817.
2. U. Schmidt, A. Lieberknecht and J. Wild, *Synthesis*, 1984, 53.
3. J. R. Fuchs and R. L. Funk, *Org. Lett.*, 2001, **3**, 3923.
4. K. Hayashi, J. Iyoda and I. Shiihara, *J. Organometal. Chem.*, 1967, **10**, 81.
5. M. Shimizu, T. Kamikubo and K. Ogasawara, *Heterocycles*, 1997, **46**, 21.
6. O. Tamura, T. Yanagimachi, T. Kobayashi and H. Ishibashi, *Org. Lett.*, 2001, **3**, 2427.
7. H. Zhai, S. Luo, C. Ye and Y. Ma, *J. Org. Chem.*, 2003, **68**, 8268.
8. S. Shiotani, H. Okada, K. Nakamata, T. Yamamoto and F. Sekino, *Heterocycles*, 1996, **43**, 1031.
